# Supplementary material
Source: PubMed Central journal article supplement (PMC3737388)
Supplement: NIHMS445922-supplement-01.pdf [file NIHMS445922-supplement-01.pdf]

**Table 1:** Proportion of patients in each health state after year 1 and 2 from the DRCRNet Trial.

| Parameter                         | Year 1             | Year 2             |
|-----------------------------------|--------------------|--------------------|
| <b>Laser</b>                      |                    |                    |
| ≥ 20/25                           | 0.20 (0.15 - 0.25) | 0.21 (0.16 - 0.26) |
| 20/32-20/40                       | 0.3 (0.25 - 0.35)  | 0.36 (0.31 - 0.41) |
| 20/50-20/63                       | 0.25 (0.2 - 0.3)   | 0.18 (0.14 - 0.22) |
| 20/80-20/100                      | 0.11 (0.07 - 0.15) | 0.10 (0.07 - 0.13) |
| 20/125-20/160                     | 0.08 (0.05 - 0.11) | 0.04 (0.02 - 0.06) |
| ≤ 20/200                          | 0.06 (0.03 - 0.09) | 0.10 (0.07 - 0.13) |
| <b>Ranibizumab+Laser*</b>         |                    |                    |
| ≥ 20/25                           | 0.34 (0.27 - 0.41) | 0.37 (0.3 - 0.44)  |
| 20/32-20/40                       | 0.37 (0.3 - 0.44)  | 0.31 (0.24 - 0.38) |
| 20/50-20/63                       | 0.14 (0.09 - 0.19) | 0.11 (0.07 - 0.15) |
| 20/80-20/100                      | 0.06 (0.03 - 0.09) | 0.08 (0.04 - 0.12) |
| 20/125-20/160                     | 0.04 (0.01 - 0.07) | 0.1 (0.06 - 0.14)  |
| ≤ 20/200                          | 0.04 (0.01 - 0.07) | 0.03 (0.01 - 0.05) |
| <b>Ranibizumab+Delayed Laser*</b> |                    |                    |
| ≥ 20/25                           | 0.35 (0.28 - 0.42) | 0.32 (0.25 - 0.39) |
| 20/32-20/40                       | 0.35 (0.28 - 0.42) | 0.38 (0.31 - 0.45) |
| 20/50-20/63                       | 0.18 (0.13 - 0.23) | 0.2 (0.14 - 0.26)  |
| 20/80-20/100                      | 0.09 (0.05 - 0.13) | 0.06 (0.03 - 0.09) |
| 20/125-20/160                     | 0.02 (0 - 0.04)    | 0.01 (0 - 0.02)    |
| ≤ 20/200                          | 0.02 (0 - 0.04)    | 0.04 (0.01 - 0.07) |
| <b>Triamcinolone+Laser</b>        |                    |                    |
| ≥ 20/25                           | 0.22 (0.16 - 0.28) | 0.29 (0.22 - 0.36) |
| 20/32-20/40                       | 0.3 (0.23 - 0.37)  | 0.25 (0.19 - 0.31) |
| 20/50-20/63                       | 0.23 (0.17 - 0.29) | 0.13 (0.08 - 0.18) |
| 20/80-20/100                      | 0.15 (0.1 - 0.2)   | 0.18 (0.12 - 0.24) |
| 20/125-20/160                     | 0.08 (0.04 - 0.12) | 0.05 (0.02 - 0.08) |
| ≤ 20/200                          | 0.03 (0.01 - 0.05) | 0.1 (0.06 - 0.14)  |

\*For analyses with bevacizumab, we assumed equal efficacy to ranibizumab.
