# Supplementary material
Source: PubMed Central journal article supplement (PMC3737388)
Supplement: NIHMS445922-supplement-10.pdf [file NIHMS445922-supplement-10.pdf]

**Table 4:** Incremental Cost Effectiveness of the Different Therapies for Diabetic Macular Edema Assuming All Participants are Pseudophakic Upon Model Entry

| <b>Base model (using ranibizumab)</b> |            |       |              |
|---------------------------------------|------------|-------|--------------|
| Therapy                               | Cost (USD) | QALYs | ICER         |
| Laser alone                           | 19690      | 10.41 | Lowest cost* |
| L+T                                   | 22411      | 9.54  | ***          |
| L+R                                   | 57935      | 10.83 | 89906**      |
| DL+R                                  | 61075      | 10.99 | 71226        |
| <b>Base model (using bevacizumab)</b> |            |       |              |
| Therapy                               | Cost (USD) | QALYs | ICER         |
| Laser alone                           | 19690      | 10.41 | Lowest cost* |
| L+T                                   | 22411      | 9.54  | ***          |
| L+B                                   | 26878      | 10.83 | ***          |
| DL+B                                  | 26135      | 10.99 | 11093        |
| <b>Including CVA and AMI outcomes</b> |            |       |              |
| Therapy                               | Cost (USD) | QALYs | ICER         |
| Laser alone                           | 65289      | 10.15 | 41031**      |
| L+T                                   | 38383      | 9.49  | Lowest cost* |
| L+R                                   | 72937      | 10.73 | 13043        |
| DL+R                                  | 76039      | 10.88 | 27039        |
| <b>Including CVA and AMI outcomes</b> |            |       |              |
| Therapy                               | Cost (USD) | QALYs | ICER         |
| Laser alone                           | 65289      | 10.15 | ***          |
| L+T                                   | 38383      | 9.49  | Lowest Cost* |
| L+B                                   | 42071      | 10.73 | ***          |
| DL+B                                  | 41315      | 10.88 | 2105         |

\* intervention had the lowest costs so other interventions are measured compared to it. The lowest-cost intervention will not have an ICER

\*\* Dominated by extended dominance, meaning that the delayed laser strategy offers more health benefits at a lower cost per QALY

\*\*\* Dominated by strict dominance, meaning that another strategy has both more health benefits and a lower cost

ICER = incremental cost-effectiveness ratio; QALY = quality-adjusted life year; L+T = laser + intravitreal triamcinolone group; L+R = laser + ranibizumab group; L+B= laser + bevacizumab group; DL+R = delayed laser + ranibizumab group; DL+B = delayed laser + bevacizumab group; CVA = cerebrovascular disease; AMI = acute myocardial infraction; USD = United States dollars
